# Supplementary material
Source: PubMed Central journal article supplement (PMC5682963)
Supplement: 10.1074_M117.808121_jbc.M117.808121-1.pdf [file 10.1074_M117.808121_jbc.M117.808121-1.pdf]

**Figure S1.**

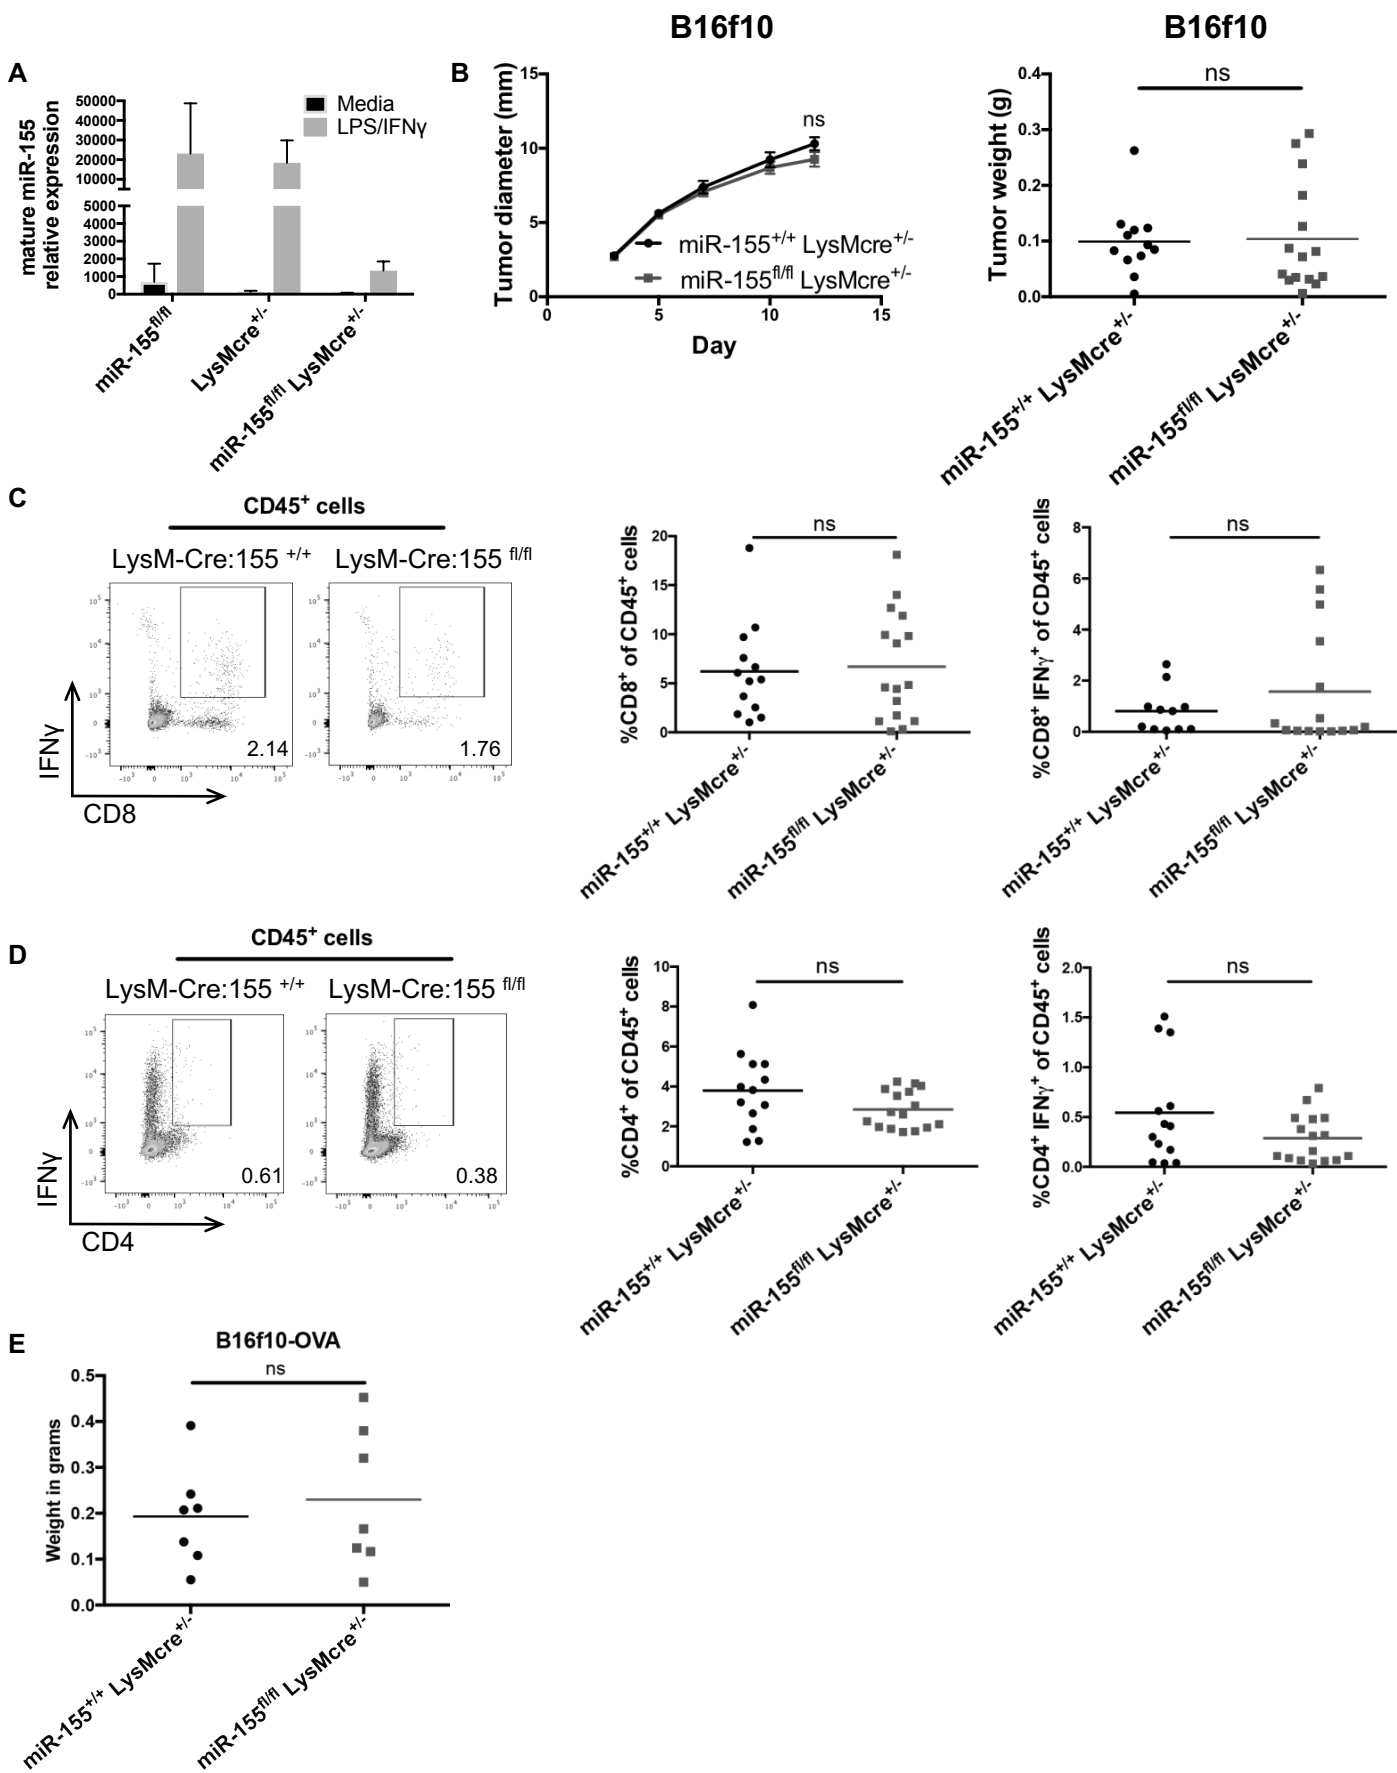

**Supplemental Figure 1. Similar anti-tumor immune responses to syngeneic tumors by miR-155 MCKO and control mice**

(A) Bone marrow derived macrophages made from bone marrow stimulated with M-CSF (20ng/mL) for 7 days from indicated genotypes were treated with either media alone or LPS/IFN $\gamma$  (10ng/mL and 50ng/mL respectively) and mature miR-155 expression was assessed by qPCR utilizing miRCURY LNA Universal RT microRNA cDNA synthesis kit and miRCURY LNA UniRT PCR primer for the miR-155 5p mature sequence (Exiqon). Data shown is representative of multiple independent experiments. (B) Tumor diameter of B16f10 tumors during 12 day tumor challenge and day 12 tumor weights of these mice. (C) Representative plots of CD8<sup>+</sup>IFN $\gamma$ <sup>+</sup> tumor infiltrating T cells in Wt and MCKO mice and percentages of these cells. (D) Representative plots of CD4<sup>+</sup>IFN $\gamma$ <sup>+</sup> tumor infiltrating T cells in Wt and MCKO mice and percentages of these cells. (E) Day 12 tumor weights from mice of the indicated genotypes that were challenged with  $1 \times 10^6$  B16f10 OVA. Bar graphs represent mean  $\pm$  SD. ns indicates no significant change.

Figure S2.

A

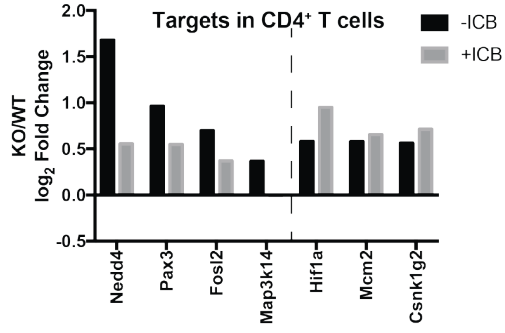

B

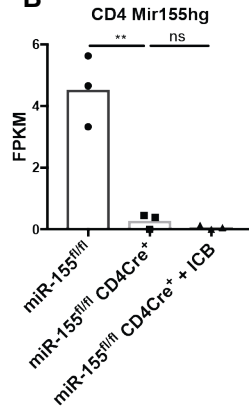

C

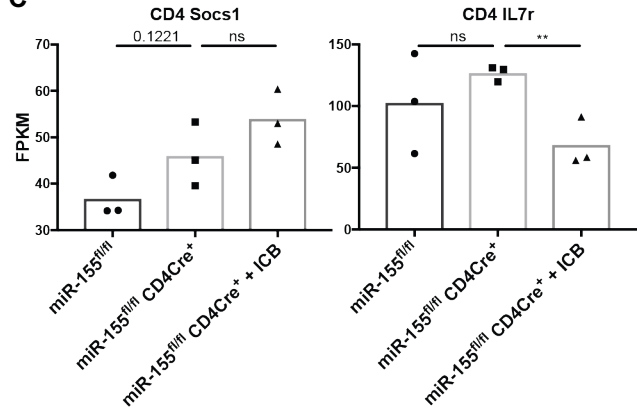

**Supplemental Figure 2. ICB recovers levels of selected miR-155 targets in CD4<sup>+</sup> T cells**

(A) Black bars represent log<sub>2</sub>FC values that were significantly increased in miR-155 TCKO CD4<sup>+</sup> T cells compared to miR-155<sup>fl/fl</sup> T cells from the tumor microenvironment and that were identified as potential miR-155 targets via HITS-CLIP analysis of miR-155 deficient T cells by Loeb et al. Grey bars indicate log<sub>2</sub>FC values from CD4<sup>+</sup> T cells of miR-155 TCKO mice treated with ICB compared to miR-155<sup>fl/fl</sup> untreated mice. (B) FPKM of miR-155 host gene expression from RNA-Seq of CD4<sup>+</sup> T cells from indicated genotypes and treatment conditions. (C) FPKM of miR-155 targets Socs1 and IL7r in CD4<sup>+</sup> T cells of indicated genotypes and treatment conditions. \*\*p<.005, ns=not significant
